# Supplementary material for: Comparison of the performance of dispersion-corrected density functional theory for weak hydrogen bonds
Source: Royal Society of Chemistry journal article supplement (doi:10.1039/c1cp20591a), 2011-01-01
Supplement: c1cp20591a.pdf [file c1cp20591a.pdf]

# **Electronic Supporting Information: Comparison of the performance of dispersion-corrected density functional theory for weak hydrogen bonds**

Waldemar Hujo and Stefan Grimme\*

## **Contents**

|          |                                                                                |          |
|----------|--------------------------------------------------------------------------------|----------|
| <b>1</b> | <b>The <math>\text{CH}_4 \cdot \text{NH}_3</math> complex</b>                  | <b>2</b> |
| <b>2</b> | <b>The <math>\text{Cl}_3\text{CH} \cdot \text{NH}_3</math> complex</b>         | <b>3</b> |
| <b>3</b> | <b>The <math>\text{NH}_3 \cdot \text{NH}_3</math> complex</b>                  | <b>4</b> |
| <b>4</b> | <b>The <math>\text{CH}_3\text{F} \cdot \text{C}_2\text{H}_2</math> complex</b> | <b>5</b> |
| <b>5</b> | <b>The <math>\text{CH}_3\text{F} \cdot \text{H}_2\text{O}</math> complex</b>   | <b>6</b> |
| <b>6</b> | <b>Errors of intermolecular distances and binding energies</b>                 | <b>7</b> |

## 1 The CH<sub>4</sub>·NH<sub>3</sub> complex

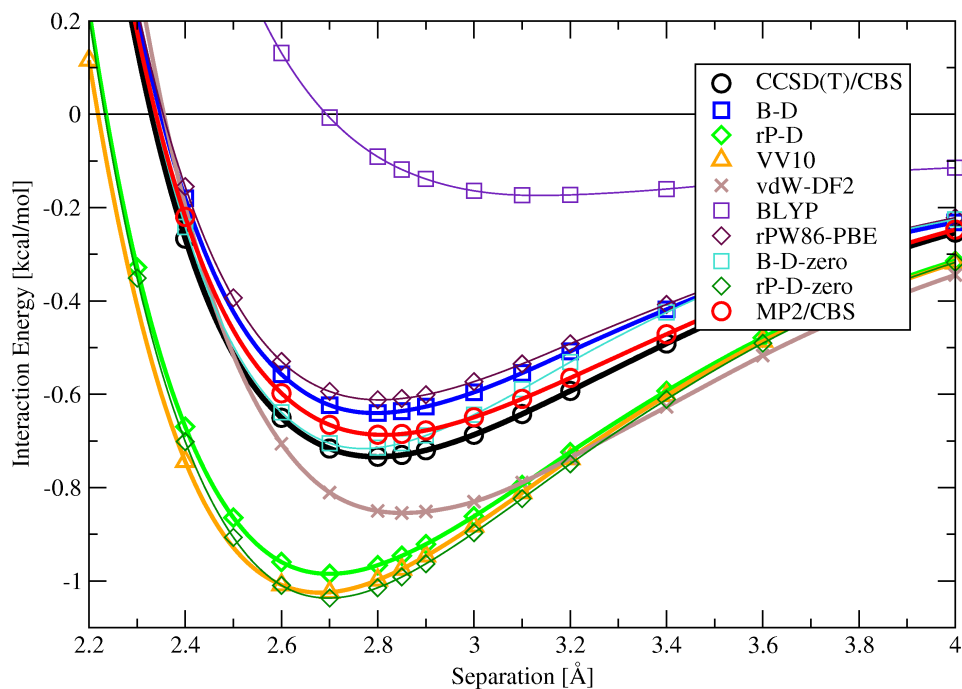

**Figure 1** Potential energy curves for CH<sub>4</sub>·NH<sub>3</sub>. Calculations were performed with the BLYP, rPW86-PBE, B-D-zero, rP-D-zero, B-D, rP-D, VV10 and vdW-DF2 methods with the aug-cc-pVQZ basis set. The reference potential energy curve was computed at the estimated CCSD(T)/CBS(aQ-a5) level of theory.

**Table 1** Binding Energy ( $\Delta E$ ) energy and equilibrium distance for CH<sub>4</sub>·NH<sub>3</sub>.

| Method    | R(H-N) [Å] | $-\Delta E$ [kcal/mol] |
|-----------|------------|------------------------|
| CCSD(T)   | 2.80       | 0.73                   |
| MP2       | 2.81       | 0.69                   |
| BLYP      | 3.13       | 0.17                   |
| rPW86-PBE | 2.80       | 0.61                   |
| B-D       | 2.80       | 0.64                   |
| rP-D      | 2.70       | 0.98                   |
| B-D-zero  | 2.77       | 0.72                   |
| rP-D-zero | 2.70       | 1.04                   |
| VV10      | 2.70       | 1.03                   |
| vdW-DF2   | 2.85       | 0.85                   |

## 2 The $\text{Cl}_3\text{CH}\cdot\text{NH}_3$ complex

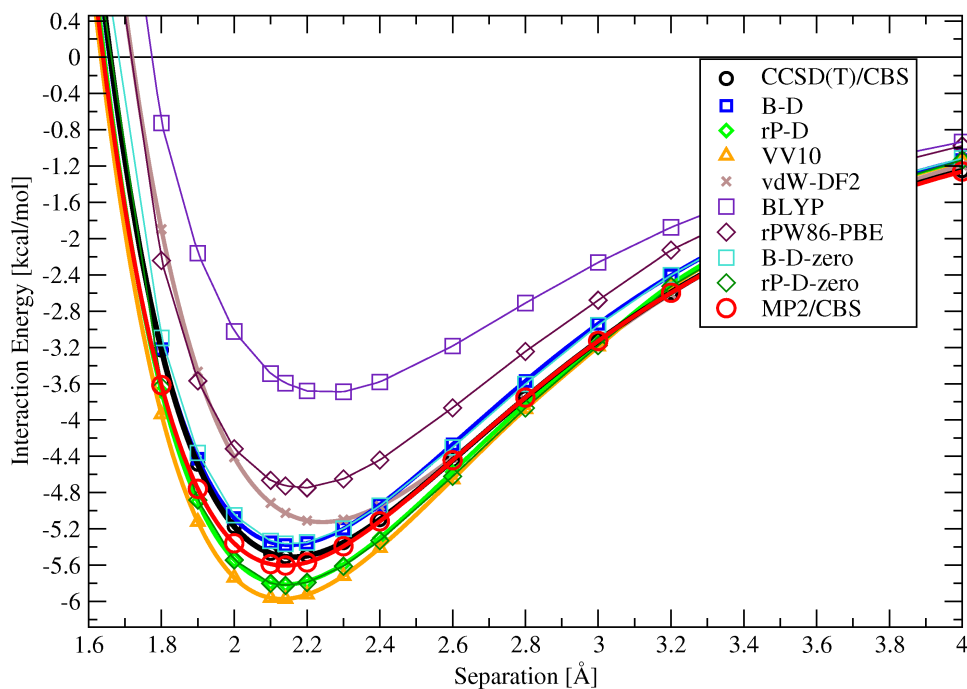

**Figure 2** Potential energy curves for  $\text{Cl}_3\text{CH}\cdot\text{NH}_3$ . Calculations were performed with the BLYP, rPW86-PBE, B-D-zero, rP-D-zero, B-D, rP-D, VV10 and vdW-DF2 methods with the aug-cc-pVQZ basis set. The reference potential energy curve was computed at the estimated CCSD(T)/CBS(aQ-a5) level of theory.

**Table 2** Binding Energy ( $\Delta E$ ) energy and equilibrium distance for  $\text{Cl}_3\text{CH}\cdot\text{NH}_3$ .

| Method    | R(H-N) [Å] | $-\Delta E$ [kcal/mol] |
|-----------|------------|------------------------|
| CCSD(T)   | 2.16       | 5.51                   |
| MP2       | 2.14       | 5.60                   |
| BLYP      | 2.29       | 3.69                   |
| rPW86-PBE | 2.20       | 4.75                   |
| B-D       | 2.15       | 5.38                   |
| rP-D      | 2.14       | 5.81                   |
| B-D-zero  | 2.15       | 5.36                   |
| rP-D-zero | 2.15       | 5.82                   |
| VV10      | 2.13       | 5.97                   |
| vdW-DF2   | 2.24       | 5.12                   |

### 3 The NH<sub>3</sub> · NH<sub>3</sub> complex

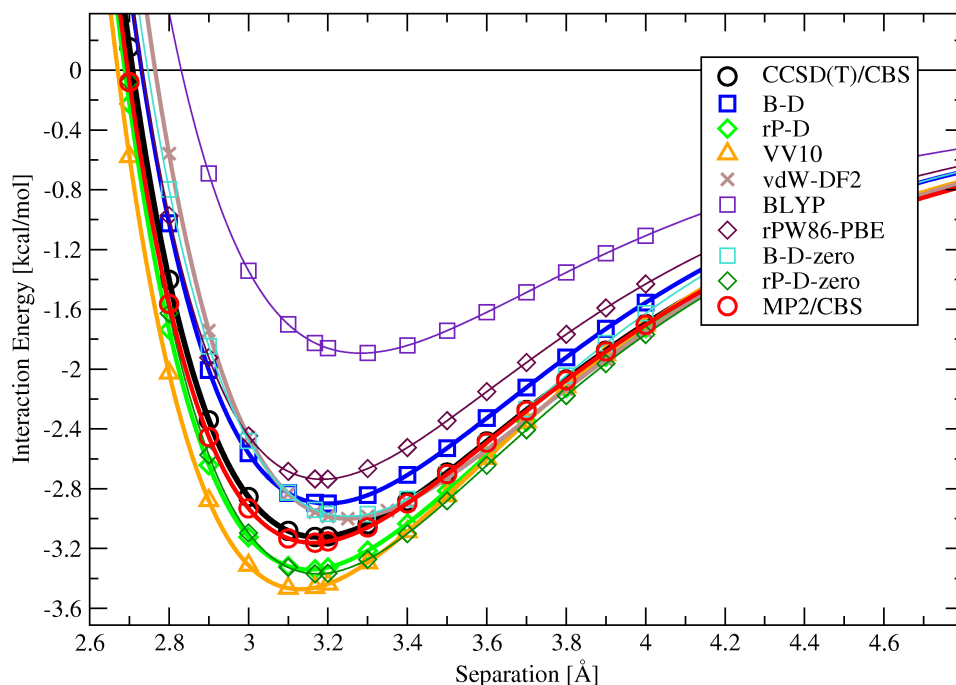

**Figure 3** Potential energy curves for NH<sub>3</sub> · NH<sub>3</sub>. Calculations were performed with the BLYP, rPW86-PBE, B-D-zero, rP-D-zero, B-D, rP-D, VV10 and vdW-DF2 methods with the aug-cc-pVQZ basis set. The reference potential energy curve was computed at the estimated CCSD(T)/CBS(aQ-a5) level of theory.

**Table 3** Binding Energy ( $\Delta E$ ) energy and equilibrium distance for NH<sub>3</sub> · NH<sub>3</sub>.

| Method    | R(N-N) [Å] | $-\Delta E$ [kcal/mol] |
|-----------|------------|------------------------|
| CCSD(T)   | 3.16       | 3.12                   |
| MP2       | 3.16       | 3.16                   |
| BLYP      | 3.28       | 1.89                   |
| rPW86-PBE | 3.19       | 2.74                   |
| B-D       | 3.20       | 2.90                   |
| rP-D      | 3.15       | 3.34                   |
| B-D-zero  | 3.25       | 2.98                   |
| rP-D-zero | 3.17       | 3.37                   |
| VV10      | 3.12       | 3.47                   |
| vdW-DF2   | 3.25       | 3.00                   |

## 4 The CH<sub>3</sub>F·C<sub>2</sub>H<sub>2</sub> complex

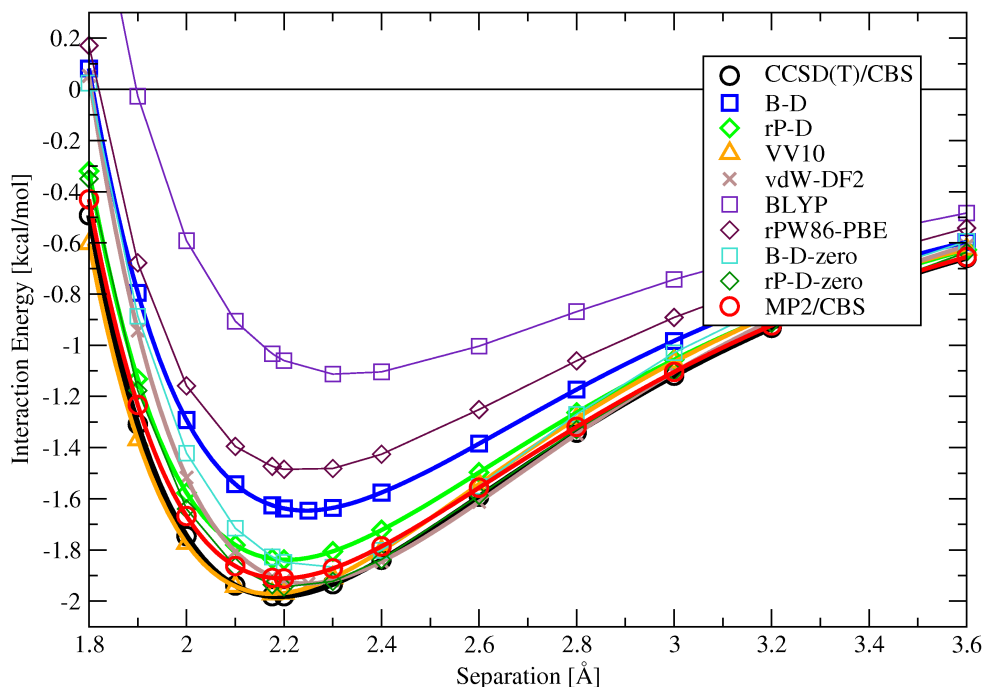

**Figure 4** Potential energy curves for CH<sub>3</sub>F·C<sub>2</sub>H<sub>2</sub>. Calculations were performed with the BLYP, rPW86-PBE, B-D-zero, rP-D-zero, B-D, rP-D, VV10 and vdW-DF2 methods with the aug-cc-pVQZ basis set. The reference potential energy curve was computed at the estimated CCSD(T)/CBS(aQ-a5) level of theory.

**Table 4** Binding Energy ( $\Delta E$ ) energy and equilibrium distance for CH<sub>3</sub>F·C<sub>2</sub>H<sub>2</sub>.

| Method    | R(H-F) [Å] | $-\Delta E$ [kcal/mol] |
|-----------|------------|------------------------|
| CCSD(T)   | 2.20       | 1.98                   |
| MP2       | 2.20       | 1.91                   |
| BLYP      | 2.30       | 1.11                   |
| rPW86-PBE | 2.20       | 1.49                   |
| B-D       | 2.25       | 1.65                   |
| rP-D      | 2.21       | 1.84                   |
| B-D-zero  | 2.30       | 1.87                   |
| rP-D-zero | 2.20       | 1.94                   |
| VV10      | 2.18       | 1.97                   |
| vdW-DF2   | 2.25       | 1.93                   |

## 5 The CH<sub>3</sub>F·H<sub>2</sub>O complex

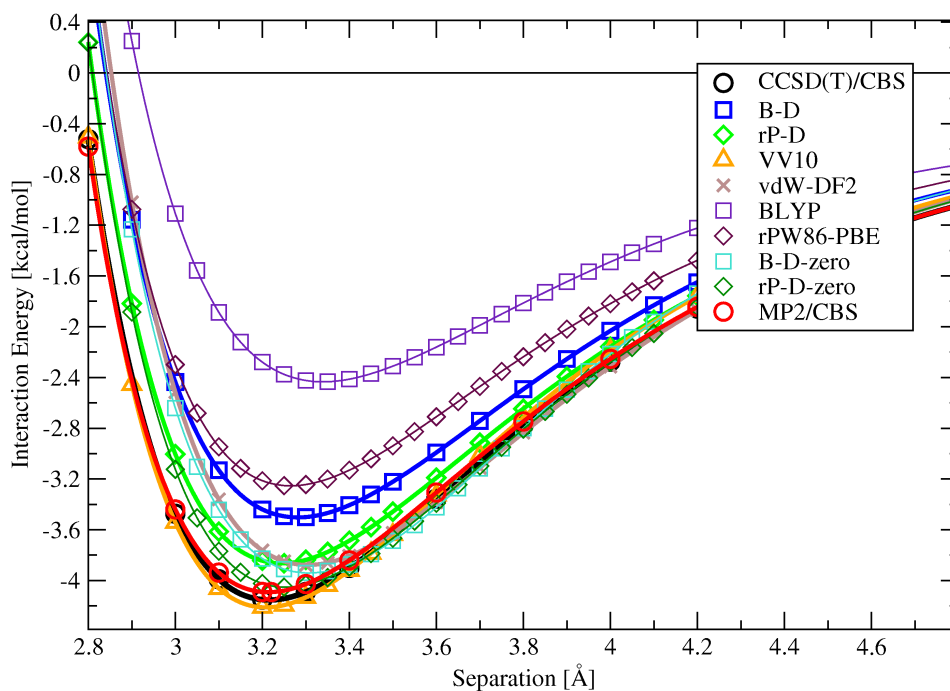

**Figure 5** Potential energy curves for CH<sub>3</sub>F·H<sub>2</sub>O. Calculations were performed with the BLYP, rPW86-PBE, B-D-zero, rP-D-zero, B-D, rP-D, VV10 and vdW-DF2 methods with the aug-cc-pVQZ basis set. The reference potential energy curve was computed at the estimated CCSD(T)/CBS(aQ-a5) level of theory.

**Table 5** Binding Energy ( $\Delta E$ ) energy and equilibrium distance for CH<sub>3</sub>F·H<sub>2</sub>O.

| Method    | R(C–O) [Å] | – $\Delta E$ [kcal/mol] |
|-----------|------------|-------------------------|
| CCSD(T)   | 3.22       | 4.15                    |
| MP2       | 3.21       | 4.09                    |
| BLYP      | 3.34       | 2.43                    |
| rPW86-PBE | 3.27       | 3.25                    |
| B-D       | 3.28       | 3.50                    |
| rP-D      | 3.24       | 3.86                    |
| B-D-zero  | 3.31       | 3.94                    |
| rP-D-zero | 3.25       | 4.05                    |
| VV10      | 3.23       | 4.21                    |
| vdW-DF2   | 3.30       | 3.88                    |

## 6 Errors of intermolecular distances and binding energies

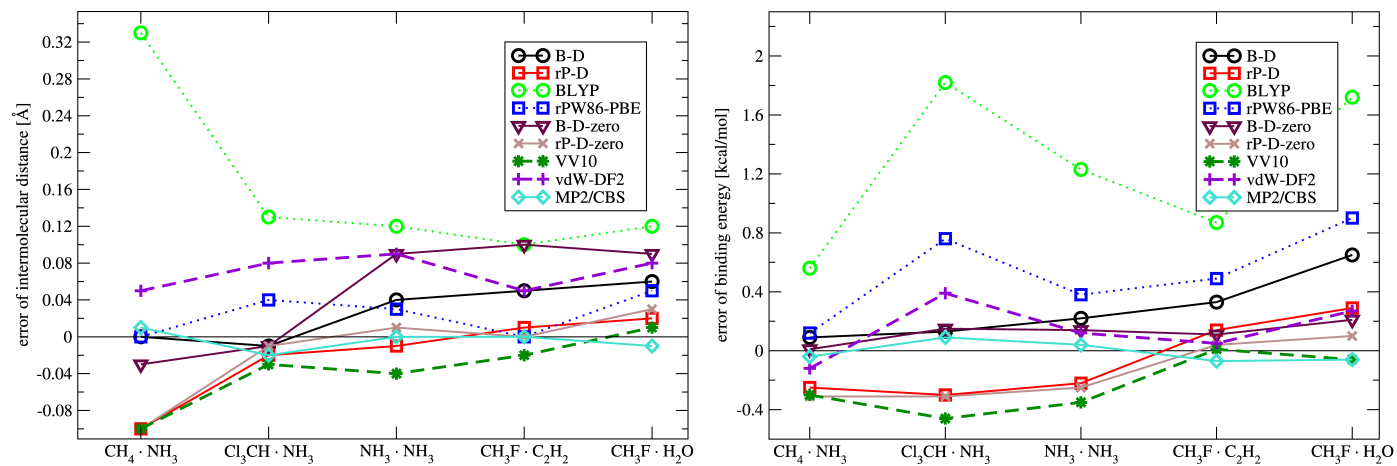

**Figure 6** Deviations of DFT-computed intermolecular distances (left) and binding energies (right) from estimated CCSD(T)/CBS(aQ-a5) reference data for all complexes.
